# Supplementary material for: SARS-CoV-2 Intra-host Evolution Is Not Favoured by Immune System Deficiencies
Source: Preprints.org preprint supplement (doi:10.20944/preprints202312.0174.v1), 2023-12-04
Supplement: Supplementary file 1 [file supplementary]

**Title:**

SARS-CoV-2 intra-host evolution is not favoured by immune system deficiencies

**Authors:** Laura Manuto<sup>1§</sup>, Martina Bado<sup>1§</sup>, Marco Cola<sup>1</sup>, Elena Vanzo<sup>1</sup>, Maria Antonello<sup>1</sup>, Giorgia Mazzotti<sup>1</sup>, Monia Pacenti<sup>2</sup>, Giampaolo Cordioli, Lolita Sasset<sup>2</sup>, Anna Maria Cattelan<sup>1,2</sup>, Stefano Toppo<sup>1\*</sup>, Enrico Lavezzo<sup>1\*</sup>

<sup>§</sup>These authors contributed equally to this work

<sup>\*</sup>Authors jointly supervised this work

**Affiliations:** <sup>1</sup>University of Padova, Padova, Italy; <sup>2</sup>University Hospital of Padova, Padova, Italy

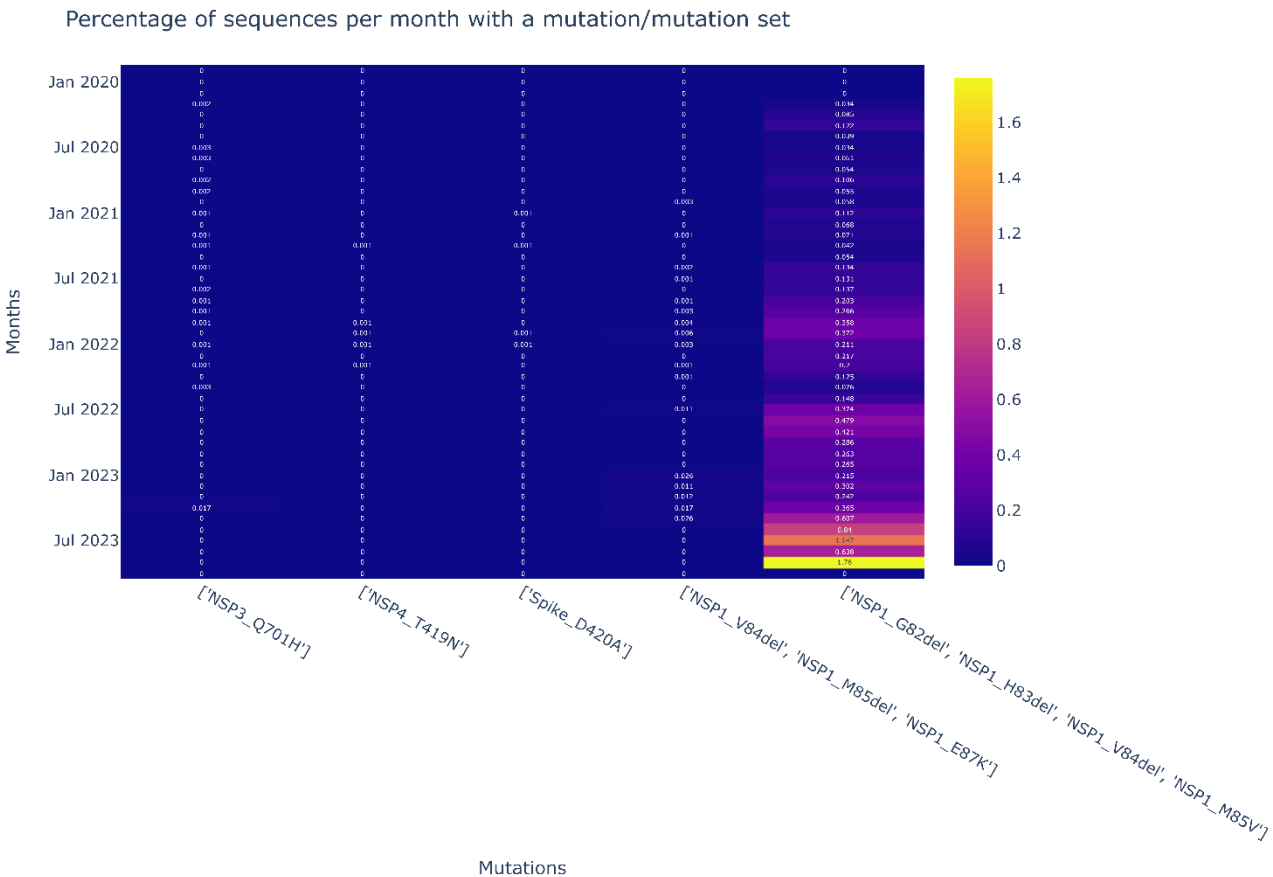

**Figure S1. Frequency of the emerged non-synonymous mutations in GISAID.** The heatmap reports the monthly frequency of SARS-CoV-2 sequences available in GISAID and carrying either NSP3\_Q701H, NSP4\_T419N, S: D420A, 519\_524del or 510\_518del. Frequency is expressed as the number of sequences carrying the mutation of interest divided by the total number of available sequences for that month. Only complete sequences sampled in humans, with high coverage and with the date including year and month were considered, according to GISAID metadata.

| Date    | ['NSP3_Q701H'] | ['NSP4_T419N'] | ['Spike_D420A'] | ['NSP1_V84del', 'NSP1_M85del', 'NSP1_E87K'] | ['NSP1_G82del', 'NSP1_H83del', 'NSP1_V84del', 'NSP1_M85V'] |
|---------|----------------|----------------|-----------------|---------------------------------------------|------------------------------------------------------------|
| 2019-12 | 0              | 0              | 0               | 0                                           | 0                                                          |
| 2020-01 | 0              | 0              | 0               | 0                                           | 0                                                          |
| 2020-02 | 0              | 0              | 0               | 0                                           | 0                                                          |
| 2020-03 | 0.002295263    | 0              | 0               | 0                                           | 0.034428939                                                |
| 2020-04 | 0              | 0              | 0               | 0                                           | 0.084959762                                                |
| 2020-05 | 0              | 0              | 0               | 0                                           | 0.12208908                                                 |
| 2020-06 | 0              | 0              | 0               | 0                                           | 0.039408867                                                |
| 2020-07 | 0.002849896    | 0              | 0               | 0                                           | 0.034198752                                                |
| 2020-08 | 0.002777392    | 0              | 0               | 0                                           | 0.061102625                                                |
| 2020-09 | 0              | 0              | 0               | 0                                           | 0.053821313                                                |
| 2020-10 | 0.001565337    | 0              | 0               | 0                                           | 0.106442928                                                |
| 2020-11 | 0.002356129    | 0              | 0               | 0                                           | 0.055369029                                                |
| 2020-12 | 0              | 0              | 0               | 0.003297147                                 | 0.057700075                                                |
| 2021-01 | 0.001023468    | 0              | 0.001023468     | 0                                           | 0.11206976                                                 |
| 2021-02 | 0              | 0              | 0               | 0                                           | 0.06817581                                                 |
| 2021-03 | 0.000595043    | 0              | 0               | 0.000595043                                 | 0.07051263                                                 |
| 2021-04 | 0.000591398    | 0.000591398    | 0.000591398     | 0                                           | 0.041989225                                                |
| 2021-05 | 0.000373343    | 0.000373343    | 0.000373343     | 0                                           | 0.053761434                                                |
| 2021-06 | 0.000925939    | 0              | 0               | 0.001851878                                 | 0.133798155                                                |
| 2021-07 | 0              | 0.00024031     | 0.00024031      | 0.00072093                                  | 0.130728692                                                |
| 2021-08 | 0.001840784    | 0              | 0               | 0.000460196                                 | 0.137445237                                                |
| 2021-09 | 0.000576844    | 0.000192281    | 0.000384563     | 0.000769126                                 | 0.202856918                                                |
| 2021-10 | 0.000611582    | 0              | 0.000407721     | 0.003057911                                 | 0.265630511                                                |
| 2021-11 | 0.001465729    | 0.000651435    | 0.000325718     | 0.004234328                                 | 0.357637831                                                |
| 2021-12 | 0.000479036    | 0.001437109    | 0.00119759      | 0.005987952                                 | 0.371732075                                                |
| 2022-01 | 0.001128044    | 0.001128044    | 0.001128044     | 0.003384133                                 | 0.210944286                                                |
| 2022-02 | 0              | 0              | 0               | 0                                           | 0.216584996                                                |
| 2022-03 | 0.00097996     | 0.00097996     | 0               | 0.00097996                                  | 0.199911804                                                |
| 2022-04 | 0              | 0              | 0               | 0.001083459                                 | 0.124597766                                                |
| 2022-05 | 0.00276606     | 0              | 0               | 0                                           | 0.076066662                                                |
| 2022-06 | 0              | 0              | 0               | 0                                           | 0.147973457                                                |
| 2022-07 | 0              | 0              | 0               | 0.011335298                                 | 0.374064838                                                |
| 2022-08 | 0              | 0              | 0               | 0                                           | 0.47897818                                                 |
| 2022-09 | 0              | 0              | 0               | 0                                           | 0.420757363                                                |
| 2022-10 | 0              | 0              | 0               | 0                                           | 0.286289895                                                |
| 2022-11 | 0              | 0              | 0               | 0                                           | 0.263092987                                                |
| 2022-12 | 0              | 0              | 0               | 0                                           | 0.265404203                                                |
| 2023-01 | 0              | 0              | 0               | 0.025819778                                 | 0.215164816                                                |
| 2023-02 | 0              | 0              | 0               | 0.011190689                                 | 0.302148612                                                |
| 2023-03 | 0              | 0              | 0               | 0.012100678                                 | 0.242013553                                                |
| 2023-04 | 0.017391304    | 0              | 0               | 0.017391304                                 | 0.365217391                                                |
| 2023-05 | 0              | 0              | 0               | 0.026378264                                 | 0.606700079                                                |
| 2023-06 | 0              | 0              | 0               | 0                                           | 0.839895013                                                |
| 2023-07 | 0              | 0              | 0               | 0                                           | 1.147342995                                                |
| 2023-08 | 0              | 0              | 0               | 0                                           | 0.637522769                                                |
| 2023-09 | 0              | 0              | 0               | 0                                           | 1.759530792                                                |
| 2023-10 | 0              | 0              | 0               | 0                                           | 0                                                          |

**Table S1.** Monthly frequency of SARS-CoV-2 sequences available in GISAID and carrying either NSP3\_Q701H, NSP4\_T419N, S: D420A, 519\_524del or 510\_518del.

a

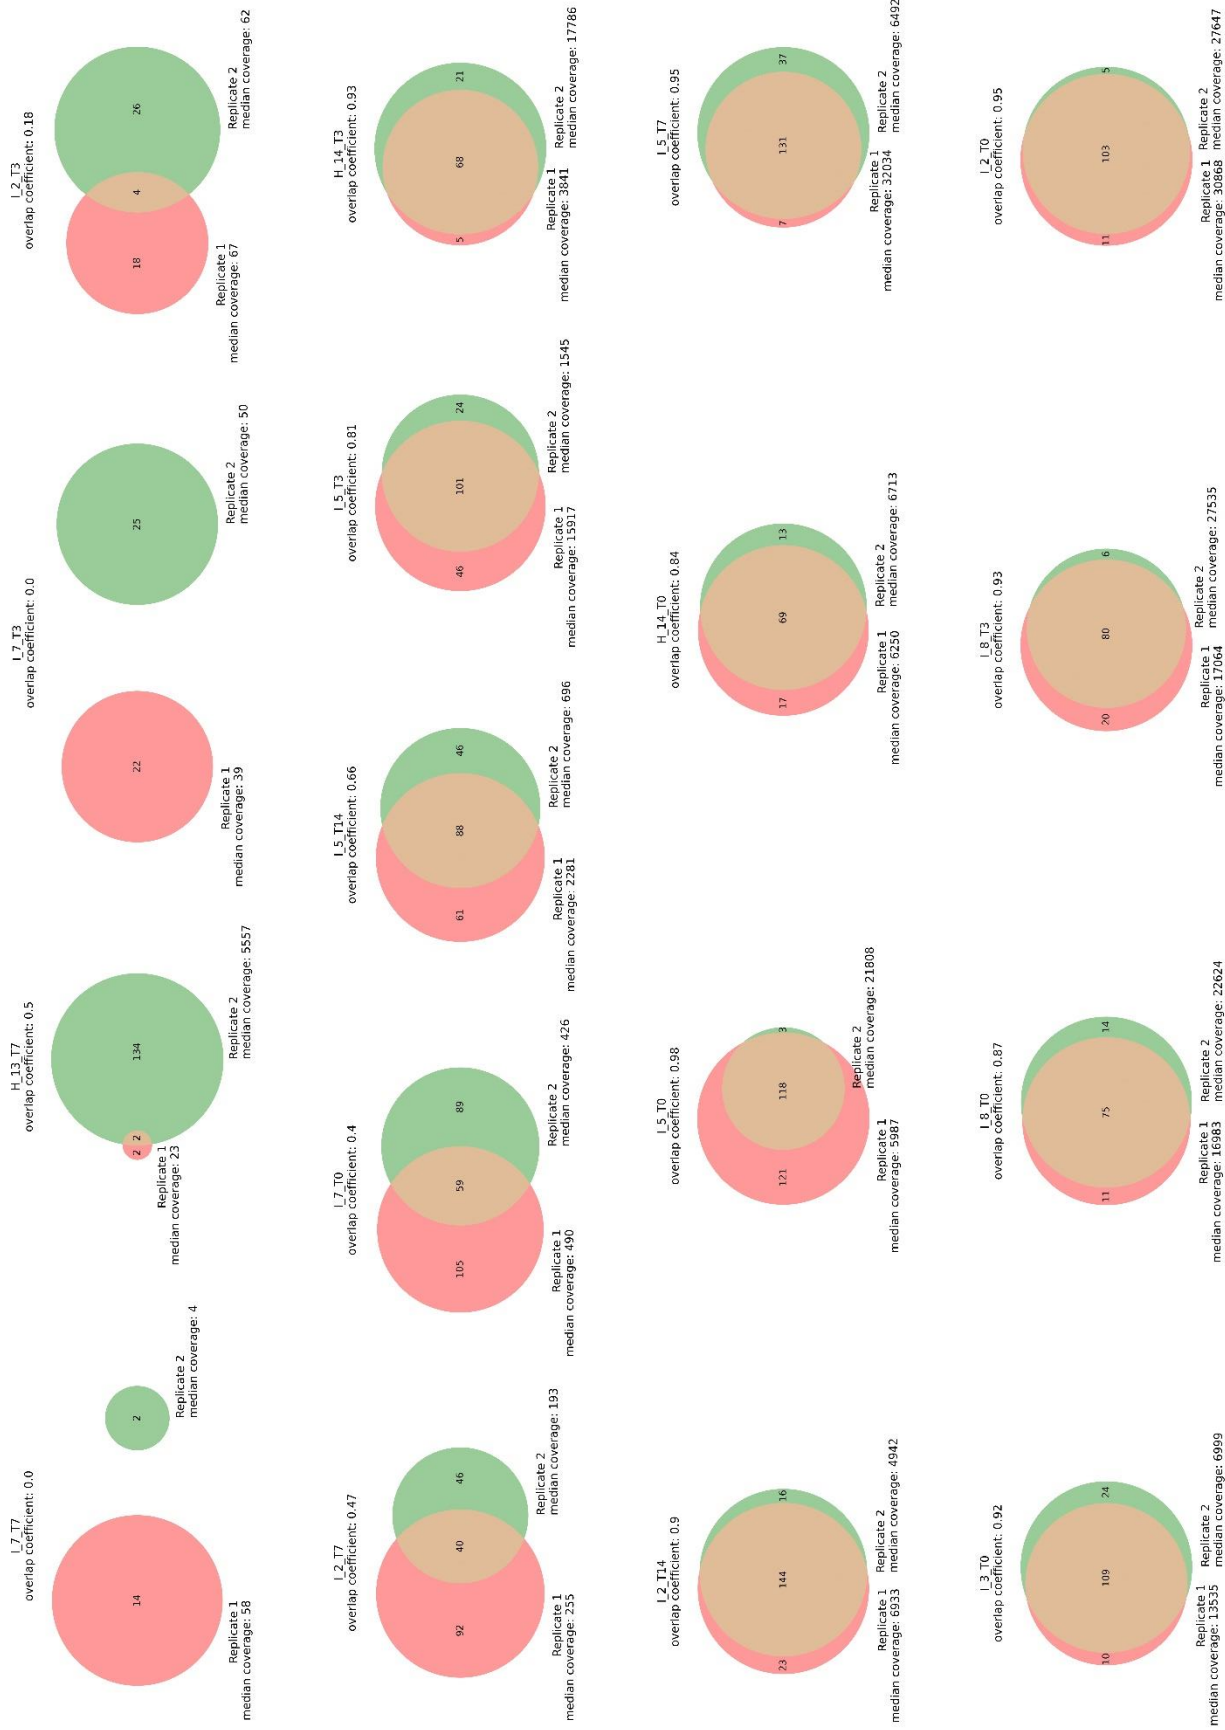

b

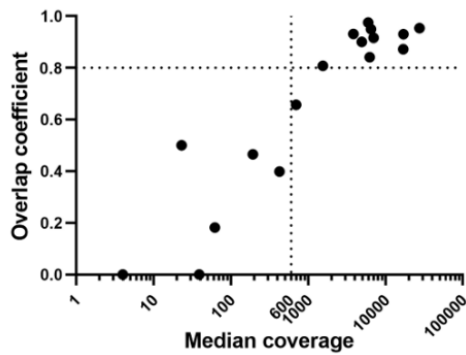

**Figure S2. Minor variants reproducibility.** Overlap coefficient of minor variants identified in both replicates of the 17 samples that were sequenced twice. For a minor variant to be called, its frequency must be at least 1% and lower than 50%. a) Venn diagrams showing the overlap coefficient per each sample sequenced twice. The name of each sample is reported on top of Venn diagrams, while the median coverage of each replicate is provided below the relative circle. b) Overlap coefficient correlation with median coverage.

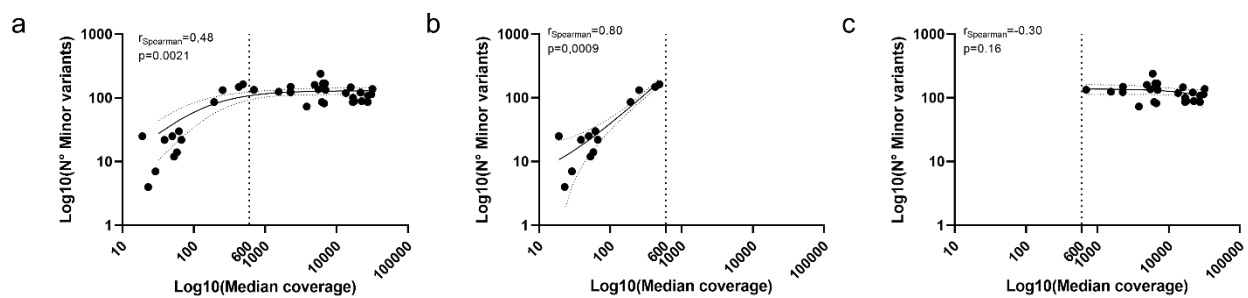

**Figure S3. Correlation between minor variants and median coverage.** The correlation between the number of minor variants called and the sequencing depth of the sample was investigated on a) all the samples sequenced twice, b) on the samples with median coverage below 600 reads per genomic position, c) on the samples with median coverage equal or greater than 600 reads per genomic position. The Spearman correlation with the relative  $p$  value is provided for each scenario.

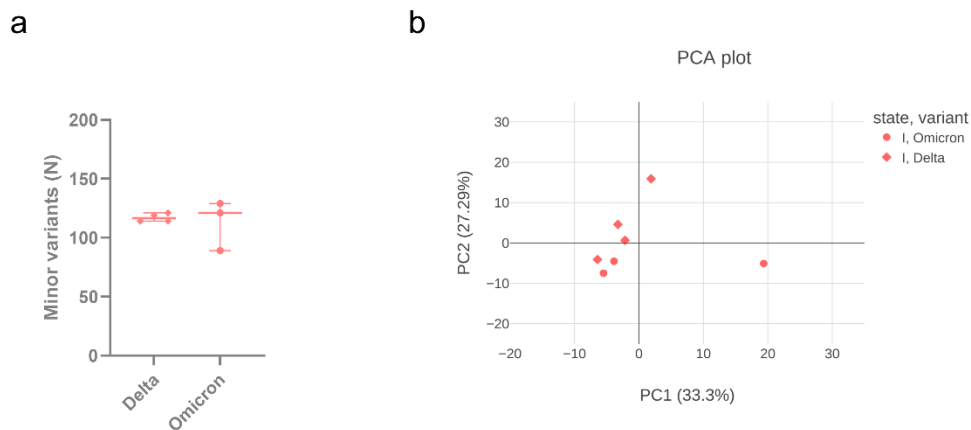

**Figure S4. Delta and Omicron minor variants are comparable in number and type.** a) Number of minor variants identified at T0 in immunocompromised subjects that were infected with Omicron variant compared with the ones identified in subjects infected with Delta variant ( $N_{\text{Delta}}=4$ ,  $\text{Median}_{\text{Delta}}=116.5$ ,  $N_{\text{Omicron}}=3$ ,  $\text{Median}_{\text{Omicron}}=121.0$ ,  $p=0.8$ , Mann-Whitney test). b) Principal component analysis of the minor variants detected in Delta and Omicron samples. The variation explained by each PC is provided along the relative axis.

| GenBank_ID | GiSAID ID        | Immune state | Sample N° | T   | Full_ID | CollectionDate | Consensus | MinVars |
|------------|------------------|--------------|-----------|-----|---------|----------------|-----------|---------|
| OR841441   | EPI_ISL_18541893 | H            | 1         | T3  | H_1_T3  | 27/12/2021     | x         | x       |
| OR841443   | EPI_ISL_18541894 | H            | 1         | T7  | H_1_T7  | 31/12/2021     | x         |         |
| OR841445   | EPI_ISL_18541906 | H            | 2         | T0  | H_2_T0  | 15/02/2022     | x         | x       |
| OR841446   | EPI_ISL_18541907 | H            | 3         | T0  | H_3_T0  | 15/02/2022     | x         | x       |
| OR841447   | EPI_ISL_18541908 | H            | 4         | T0  | H_4_T0  | 16/02/2022     | x         | x       |
| OR841448   | EPI_ISL_18541909 | H            | 4         | T2  | H_4_T2  | 18/02/2022     | x         |         |
| OR841453   | EPI_ISL_18541910 | H            | 5         | T0  | H_5_T0  | 15/03/2022     | x         |         |
| OR841459   | EPI_ISL_18541911 | H            | 5         | T7  | H_5_T7  | 22/03/2022     | x         |         |
| OR841452   | EPI_ISL_18541912 | H            | 6         | T0  | H_6_T0  | 15/03/2022     | x         |         |
| OR841460   | EPI_ISL_18541913 | H            | 6         | T7  | H_6_T7  | 22/03/2022     | x         |         |
| OR841454   | EPI_ISL_18541914 | H            | 7         | T0  | H_7_T0  | 16/03/2022     | x         | x       |
| OR841455   | EPI_ISL_18541915 | H            | 7         | T3  | H_7_T3  | 18/03/2022     | x         |         |
| OR841461   | EPI_ISL_18541916 | H            | 7         | T7  | H_7_T7  | 23/03/2022     | x         |         |
| OR841456   | EPI_ISL_18541917 | H            | 9         | T0  | H_9_T0  | 17/03/2022     | x         | x       |
| OR841462   | EPI_ISL_18541918 | H            | 9         | T7  | H_9_T7  | 23/03/2022     | x         | x       |
| OR841457   | EPI_ISL_18541895 | H            | 10        | T0  | H_10_T0 | 16/03/2022     | x         | x       |
| OR841458   | EPI_ISL_18541896 | H            | 11        | T0  | H_11_T0 | 21/03/2022     | x         |         |
| OR841463   | EPI_ISL_18541897 | H            | 11        | T7  | H_11_T7 | 28/03/2022     | x         | x       |
| OR841464   | EPI_ISL_18541898 | H            | 12        | T0  | H_12_T0 | 29/03/2022     | x         | x       |
| OR841465   | EPI_ISL_18541899 | H            | 12        | T3  | H_12_T3 | 01/04/2022     | x         |         |
| OR841434   | EPI_ISL_18541900 | H            | 13        | T0  | H_13_T0 | 15/02/2022     | x         | x       |
| OR841450   | EPI_ISL_18541901 | H            | 13        | T3  | H_13_T3 | 18/02/2022     | x         |         |
| OR841418   | EPI_ISL_18541902 | H            | 13        | T7  | H_13_T7 | 22/02/2022     | x         | x       |
| OR841419   | EPI_ISL_18541903 | H            | 14        | T0  | H_14_T0 | 10/03/2022     | x         | x       |
| OR841420   | EPI_ISL_18541904 | H            | 14        | T3  | H_14_T3 | 14/03/2022     | x         | x       |
| OR841421   | EPI_ISL_18541905 | H            | 14        | T7  | H_14_T7 | 18/03/2022     | x         |         |
| OR841435   | EPI_ISL_18541919 | I            | 1         | T0  | I_1_T0  | 14/12/2021     | x         | x       |
| OR841436   | EPI_ISL_18541920 | I            | 1         | T3  | I_1_T3  | 17/12/2021     | x         |         |
| OR841437   | EPI_ISL_18541921 | I            | 1         | T7  | I_1_T7  | 21/12/2021     | x         |         |
| OR841423   | EPI_ISL_18541922 | I            | 2         | T0  | I_2_T0  | 20/12/2021     | x         | x       |
| OR841415   | EPI_ISL_18541924 | I            | 2         | T3  | I_2_T3  | 23/12/2021     | x         |         |
| OR841425   | EPI_ISL_18541925 | I            | 2         | T7  | I_2_T7  | 27/12/2021     | x         |         |
| OR841428   | EPI_ISL_18541923 | I            | 2         | T14 | I_2_T14 | 03/01/2022     | x         | x       |
| OR841424   | EPI_ISL_18541926 | I            | 3         | T0  | I_3_T0  | 22/12/2021     | x         | x       |
| OR841439   | EPI_ISL_18541927 | I            | 3         | T3  | I_3_T3  | 25/12/2021     | x         | x       |
| OR841426   | EPI_ISL_18541928 | I            | 3         | T7  | I_3_T7  | 29/12/2021     | x         | x       |
| OR841438   | EPI_ISL_18541929 | I            | 4         | T0  | I_4_T0  | 22/12/2021     | x         | x       |
| OR841440   | EPI_ISL_18541930 | I            | 4         | T3  | I_4_T3  | 25/12/2021     | x         | x       |
| OR841442   | EPI_ISL_18541931 | I            | 4         | T7  | I_4_T7  | 29/12/2021     | x         |         |
| OR841416   | EPI_ISL_18541932 | I            | 5         | T0  | I_5_T0  | 23/12/2021     | x         | x       |
| OR841417   | EPI_ISL_18541935 | I            | 5         | T3  | I_5_T3  | 26/12/2021     | x         | x       |
| OR841427   | EPI_ISL_18541936 | I            | 5         | T7  | I_5_T7  | 30/12/2021     | x         | x       |
| OR841429   | EPI_ISL_18541933 | I            | 5         | T14 | I_5_T14 | 05/01/2022     | x         | x       |
| OR841430   | EPI_ISL_18541934 | I            | 5         | T21 | I_5_T21 | 14/01/2022     | x         |         |
| OR841444   | EPI_ISL_18543347 | I            | 6         | T0  | I_6_T0  | 14/02/2022     | x         | x       |
| OR841449   | EPI_ISL_18543348 | I            | 6         | T3  | I_6_T3  | 18/02/2022     | x         |         |
| OR841451   | EPI_ISL_18543349 | I            | 6         | T7  | I_6_T7  | 21/02/2022     | x         | x       |
| OR841414   | EPI_ISL_18541937 | I            | 7         | T0  | I_7_T0  | 15/02/2022     | x         |         |
| OR841431   | EPI_ISL_18541938 | I            | 7         | T3  | I_7_T3  | 18/02/2022     | x         |         |
| OR841432   | EPI_ISL_18541939 | I            | 7         | T7  | I_7_T7  | 22/02/2022     | x         |         |
| OR841422   | EPI_ISL_18541940 | I            | 8         | T0  | I_8_T0  | 29/03/2022     | x         | x       |
| OR841433   | EPI_ISL_18541941 | I            | 8         | T3  | I_8_T3  | 01/04/2022     | x         | x       |

**Table S2.** Full list of samples ID, collection data, consensus sequence availability and fulfilment of criteria for minor variants analysis.
