# Supplementary material for: SARS-CoV-2 Intra-host Evolution Is Not Favoured by Immune System Deficiencies
Source: Preprints.org preprint supplement (doi:10.20944/preprints202312.0174.v1), 2023-12-04
Supplement: Supplementary file 2 [file supplementary]

## SUPPLEMENTAL TABLE

### **Data Availability**

GISAID Identifier: EPI\_SET\_231130qo

doi: [10.55876/gis8.231130qo](https://doi.org/10.55876/gis8.231130qo)

All genome sequences and associated metadata in this dataset are published in GISAID's EpiCoV database. To view the contributors of each individual sequence with details such as accession number, Virus name, Collection date, Originating Lab and Submitting Lab and the list of Authors, visit [10.55876/gis8.231130qo](https://gisaid.org/231130qo)

### **Data Snapshot**

- EPI\_SET\_231130qo is composed of 5,786,895 individual genome sequences.
- The collection dates range from 2019-12-24 to 2023-10-09;
- Data were collected in 216 countries and territories;
- All sequences in this dataset are compared relative to hCoV-19/Wuhan/WIV04/2019 (WIV04), the official reference sequence employed by GISAID (EPI\_ISL\_402124). Learn more at <https://gisaid.org/WIV04>.
