# Supplementary material for: SARS-CoV-2 Intra-host Evolution Is Not Favoured by Immune System Deficiencies
Source: Preprints.org preprint supplement (doi:10.20944/preprints202312.0174.v1), 2023-12-04
Supplement: Supplementary file 3 [file supplementary]

Archive with 2 entries (2 files):
- Data_availability_gisaid_epi_set_231130qo.pdf
- Supplementary_material.pdf
